# Supplementary material
Source: PubMed Central journal article supplement (PMC7007982)
Supplement: NIHMS1066915-supplement-Supplemental_Figures.pdf [file NIHMS1066915-supplement-Supplemental_Figures.pdf]

## **Supplemental Material**

# **Schlafen12 Reduces the Aggressiveness of Triple Negative Breast Cancer through Post-Transcriptional Regulation of ZEB1 That Drives Stem Cell Differentiation**

Sarmad Al-Marsoummi<sup>a</sup> Emilie Vomhof-DeKrey<sup>a,b</sup> Marc D. Basson<sup>a,b,c</sup>

<sup>a</sup>Department of Biomedical Sciences, University of North Dakota School of Medicine and the Health Sciences, Grand Forks, ND, USA, <sup>b</sup>Department of Surgery, University of North Dakota School of Medicine and the Health Sciences, Grand Forks, ND, USA, <sup>c</sup>Department of Pathology, University of North Dakota School of Medicine and the Health Sciences, Grand Forks, ND, USA

## Supplemental Figures

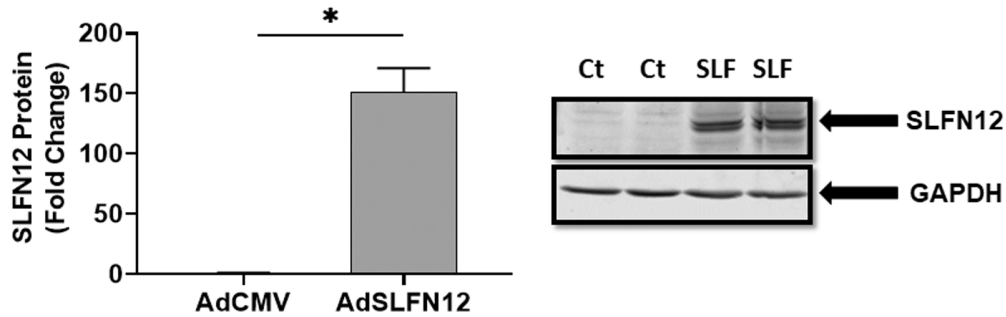

**Supplemental Figure 1:** Schlafen12 protein overexpression in MDA-MB-231 cells using adenovirus as a vector.

SLFN12 protein analysis by western blot with representative blot images in MDA-MB-231 cells 72 hours after treatment with either AdSLFN12 (SLF) or AdCMV (Ct) as a control (GAPDH used as a reference protein, data normalized to Ct group), (n=3, \*p<0.05).

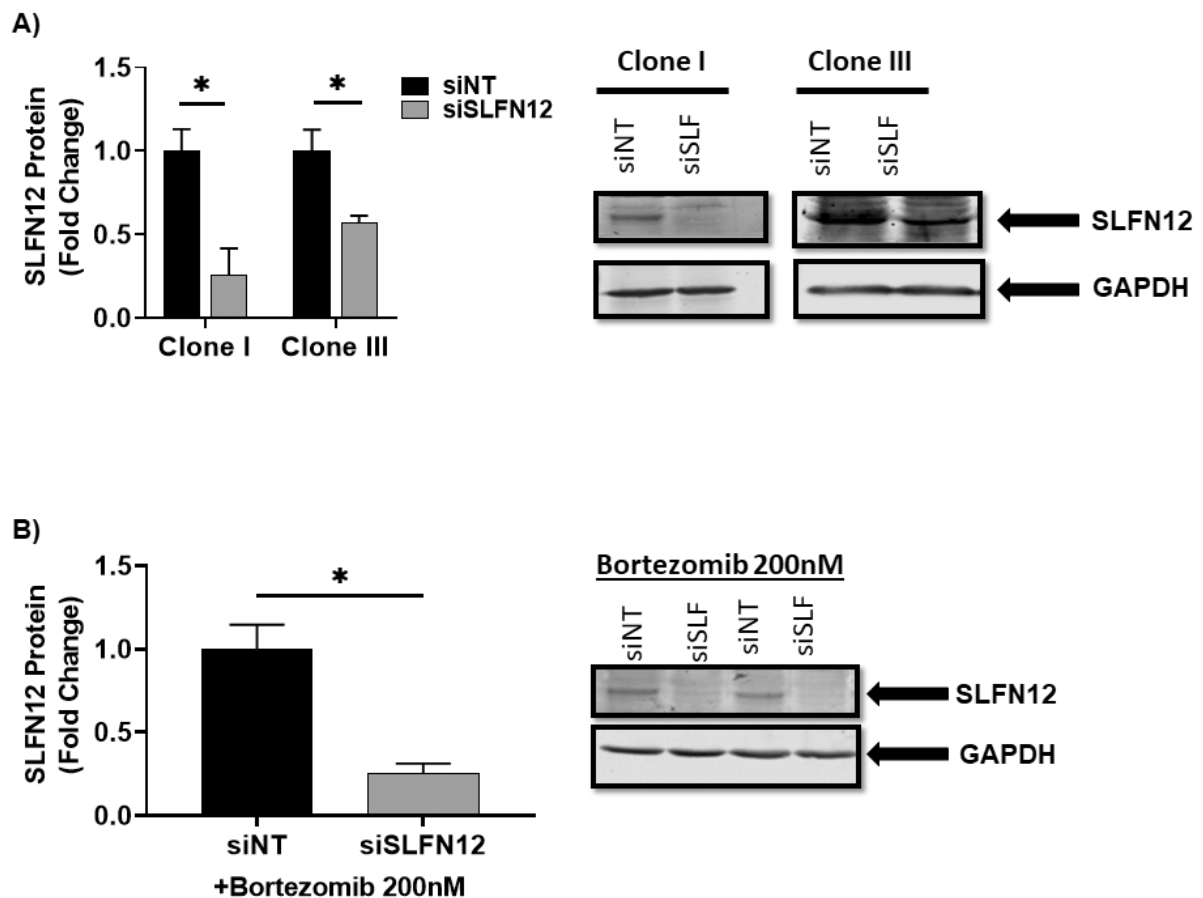

**Supplemental Figure 2: Schlafen12 protein knockdown in MDA-MB-231 cells.**

SLFN12 protein analysis by western blot with representative blot images in **A)** MDA-MB-231 clones (clone-I and clone-III) with stable SLFN12 overexpression (generated using lentivirus vector transfection with blasticidin selection), 72-hours after treatment with either siRNA targeted to Schlafen12 protein (siSLFN12) or non-targeting sequence (siNT) as a control (GAPDH used as a reference protein, data normalized to siNT group), (n=3, \*p<0.05). **B)** MDA-MB-231 cells 72 hours after treatment with either siRNA targeted to Schlafen12 protein (siSLFN12) or non-targeting sequence (siNT) as a control. Bortezomib (200nM) was added for 24 hours prior to cell lysis to increase endogenous levels of Schlafen12 to facilitate detection (GAPDH used as a reference protein, data normalized to siNT group), (n=3, \*p<0.05).

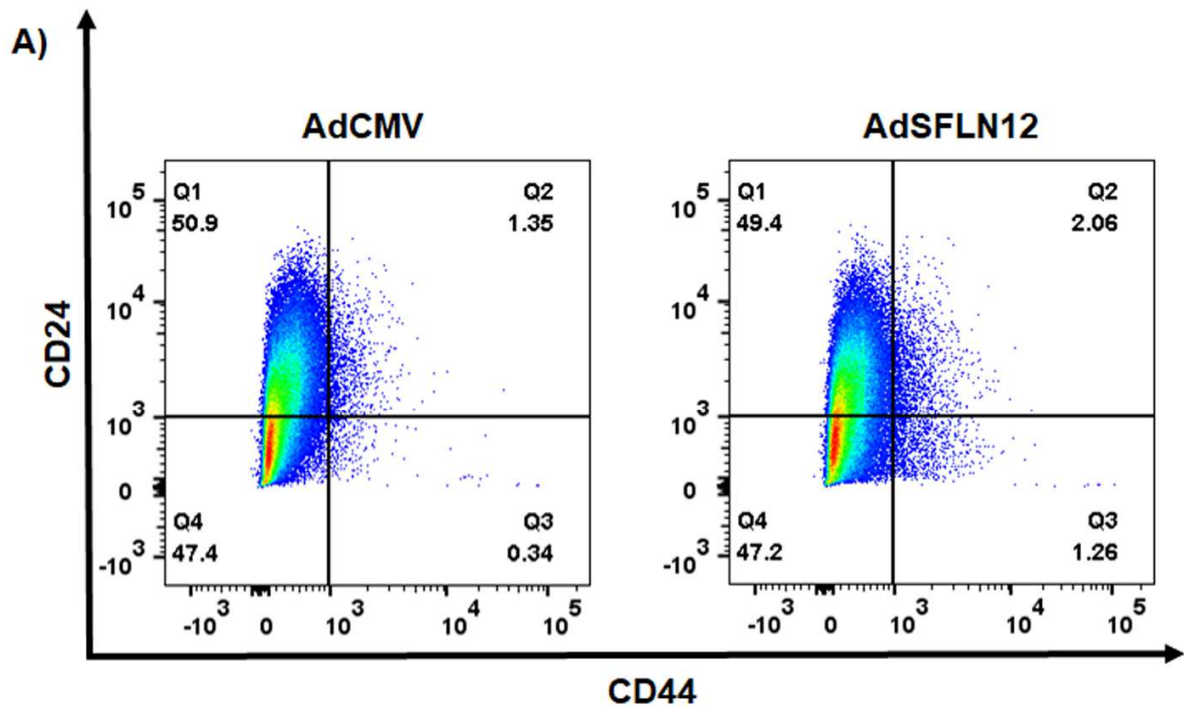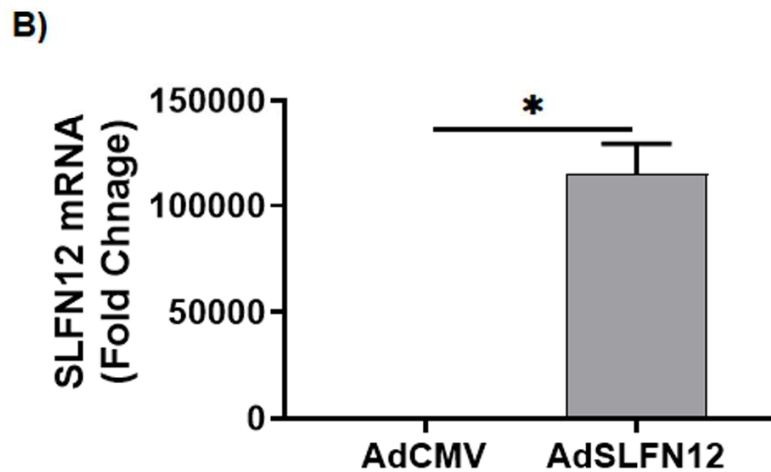

**Supplemental Figure 3: Schlafen12 does not change CD44/CD24 expression in MCF-7 cells.**

**A)** Flow cytometric analysis of MCF-7 cells 96-hours after treatment with AdSFLN12 or AdCMV showing no change in CD44<sup>low</sup>CD24<sup>high</sup> population (one of eight similar independent studies). **B)** Primer-probe qPCR analysis of SLFN12 mRNA levels in MCF-7 cells 72 hours after treatment with either AdSFLN12 or AdCMV (HPRT used as a reference gene), data normalized to AdCMV group (n=3, \*p<0.05).

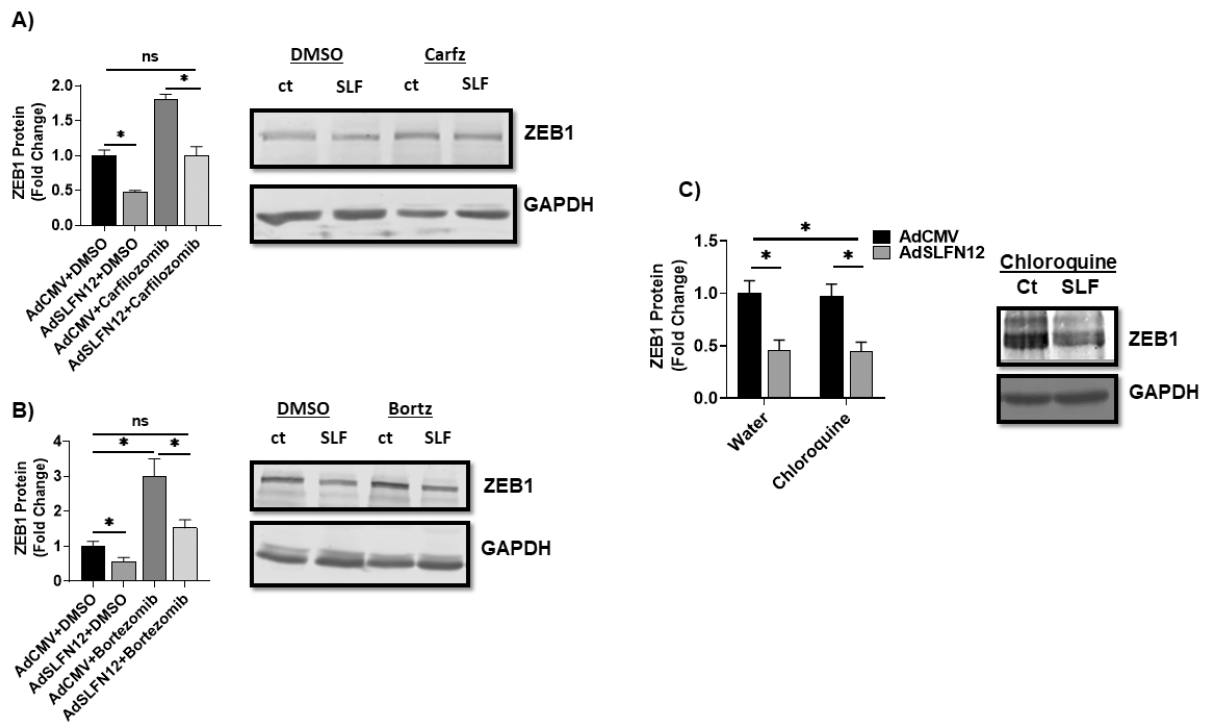

**Supplemental Figure 4: Schlafen12 attenuates proteasomal degradation of ZEB1.**

ZEB1 protein levels analysis by western blot with representative blot images in MDA-MB-231 cells 72-hours after treatment with either AdCMV or AdSLFN12 in presence of **A)** DMSO or bortezomib (500nM) for 12 hours (n=6), or **B)** DMSO or carfilzomib (10µM) for 12 hours (n=3), (\*p<0.05), or **C)** water or chloroquine (100nM) for 12 hrs., GAPDH used as a reference protein and all data normalized to AdCMV+DMSO group (n=3, \*p<0.05).
